# Supplementary material for: Intercorrelation of Molecular Biomarkers and Clinical Phenotype Measures in Fragile X Syndrome
Source: MDPI journal article supplement (doi:10.3390/cells12141920), 2023-07-24
Supplement: s1 [file s1]

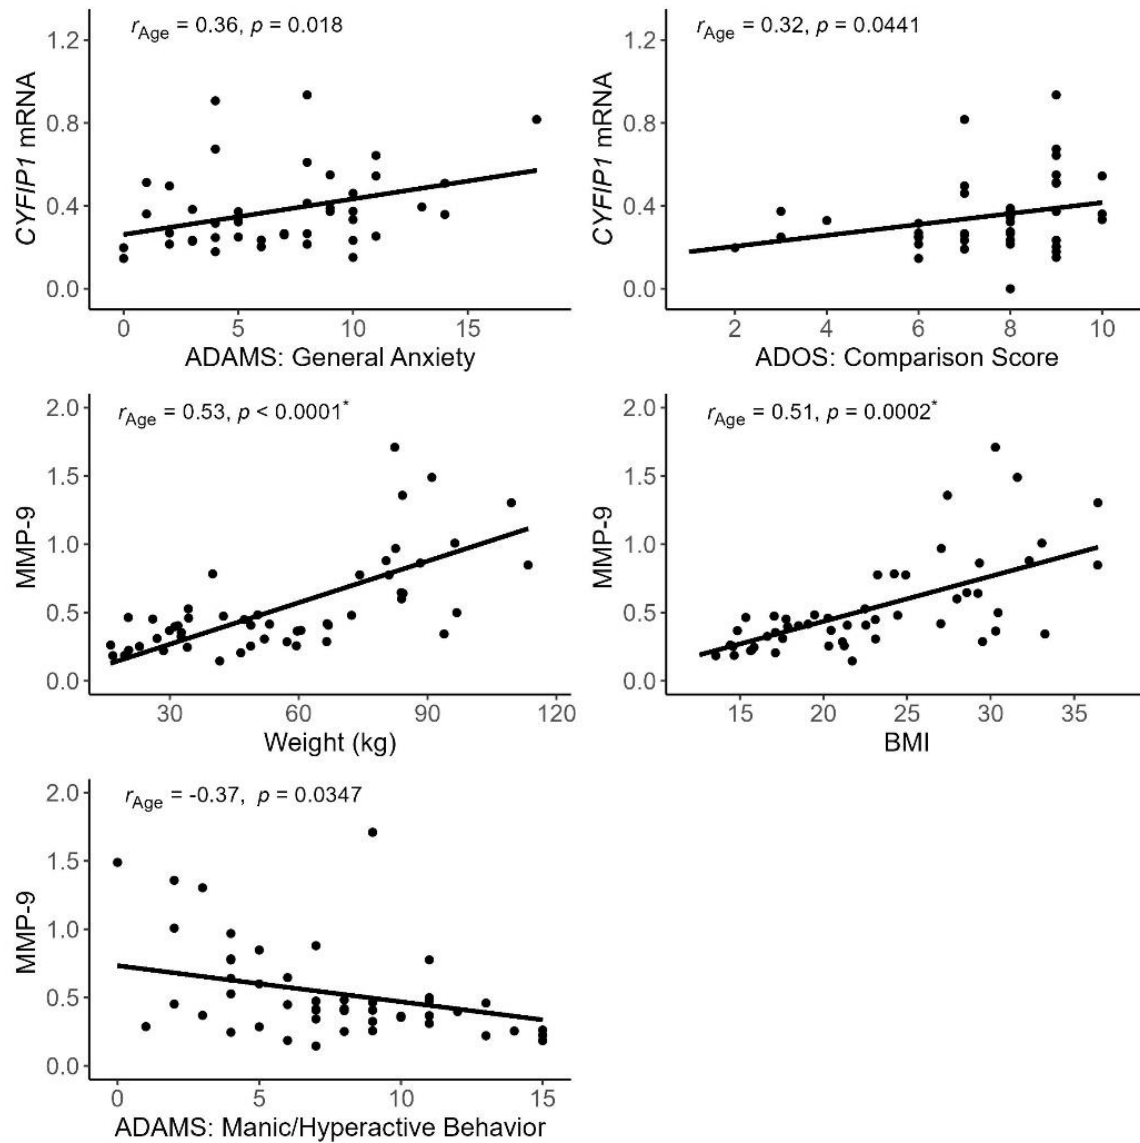

**Supplemental Figure S1.** Scatter plots of relationships of *CYFIP1* mRNA and MMP-9 with selected clinical measures.

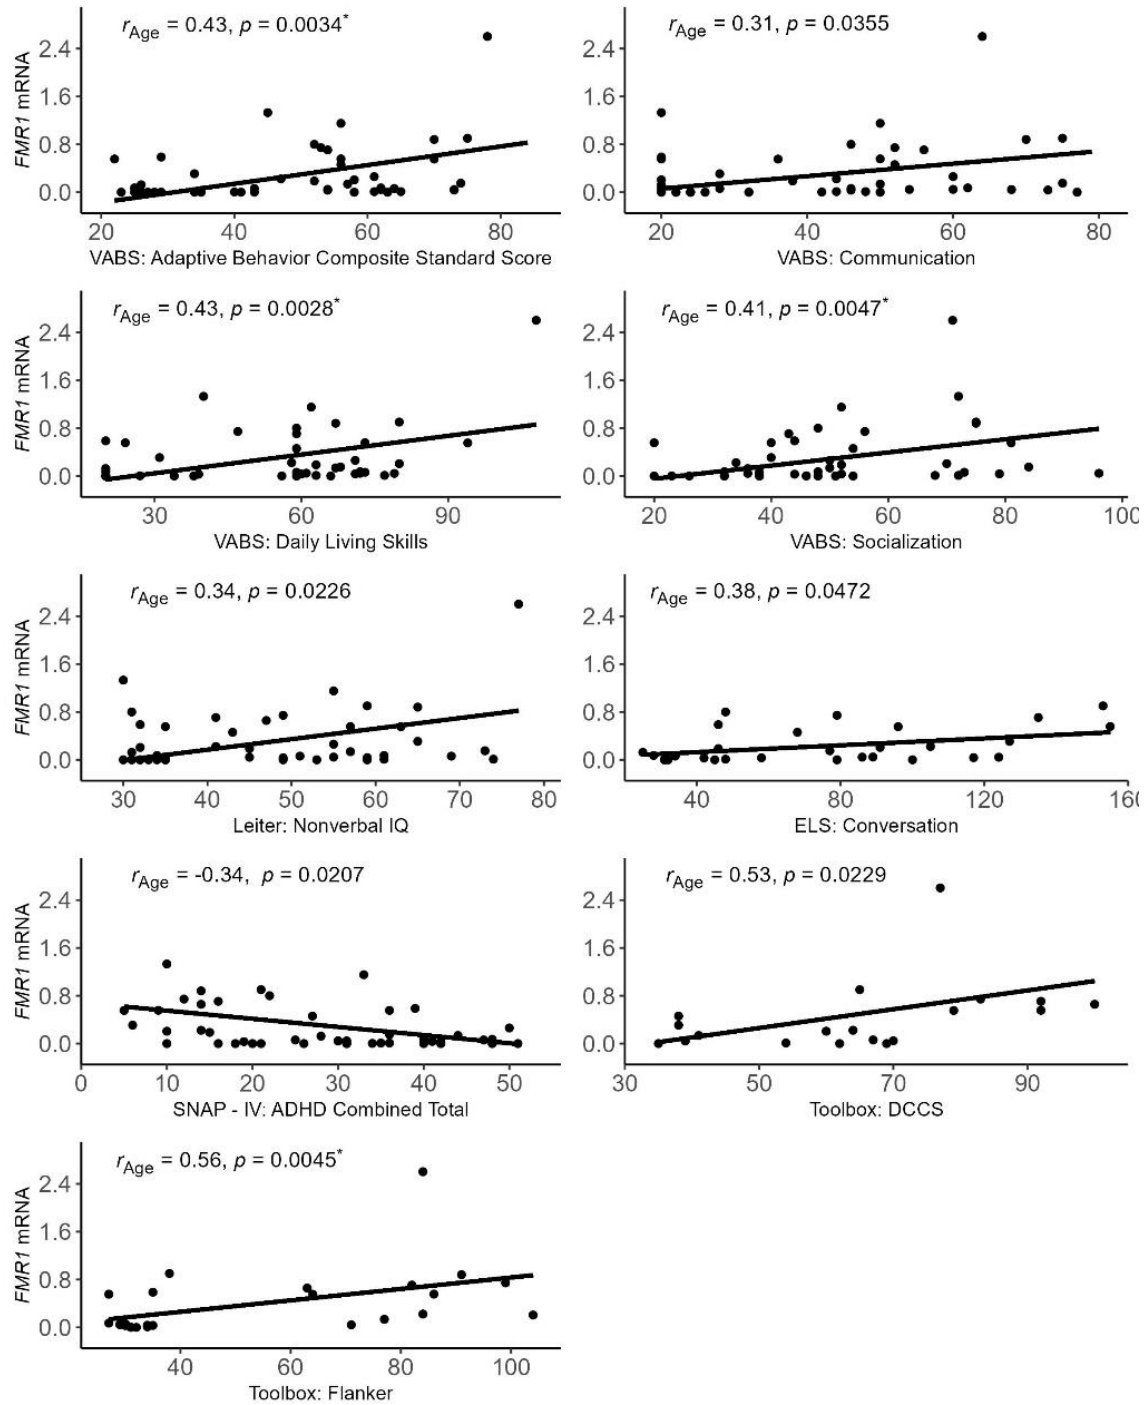

**Supplemental Figure S2.** Scatter plots of relationships of *FMR1* mRNA with selected clinical measures.
